# Supplementary material for: Simulating short-term light responses of photosynthesis and water use efficiency in sweet sorghum under varying temperature and CO2 conditions
Source: Front Plant Sci. 2024 Mar 28;15:1291630. doi: 10.3389/fpls.2024.1291630 (PMC11007071; doi:10.3389/fpls.2024.1291630)
Supplement: Supplementary file 1 [file DataSheet_1.doc]

**Simulating short-term Light Responses of Photosynthesis and Water Use Efficiency in Sweet Sorghum under Varying Temperature and CO2 Conditions**

*Xiao-Long, Yang1,2; Xiao-Fei, Ma3; Zi-Piao, Ye4*; Long-Sheng Yang1; Jun-Bo Shi1; Xun Wang1**; Bei-Bei Zhou1; Fu-Biao, Wang4; Zi-Fa, Deng1**

*1School of Life Sciences, Nantong University, Nantong, China,* *2State Key Laboratory of Environmental Chemistry and Ecotoxicology, Research Center for Eco-Environmental Sciences, Chinese Academy of Sciences,* *Beijing, China, 3Key Laboratory of Ecological Safety and Sustainable Development in Arid Lands, Northwest Institute of Eco-Environment and Resources, Chinese Academy of Sciences, Lanzhou, China, 4Institute of Biophysics in Maths & Physics College, Jinggangshan University, Ji’an, China*

** For Correspondence:*

*Zi-Piao, Ye, E-mail: yezp@jgsu.edu.cn; Zi-Fa, Deng, E-mail: dzf@ntu.edu.cn*


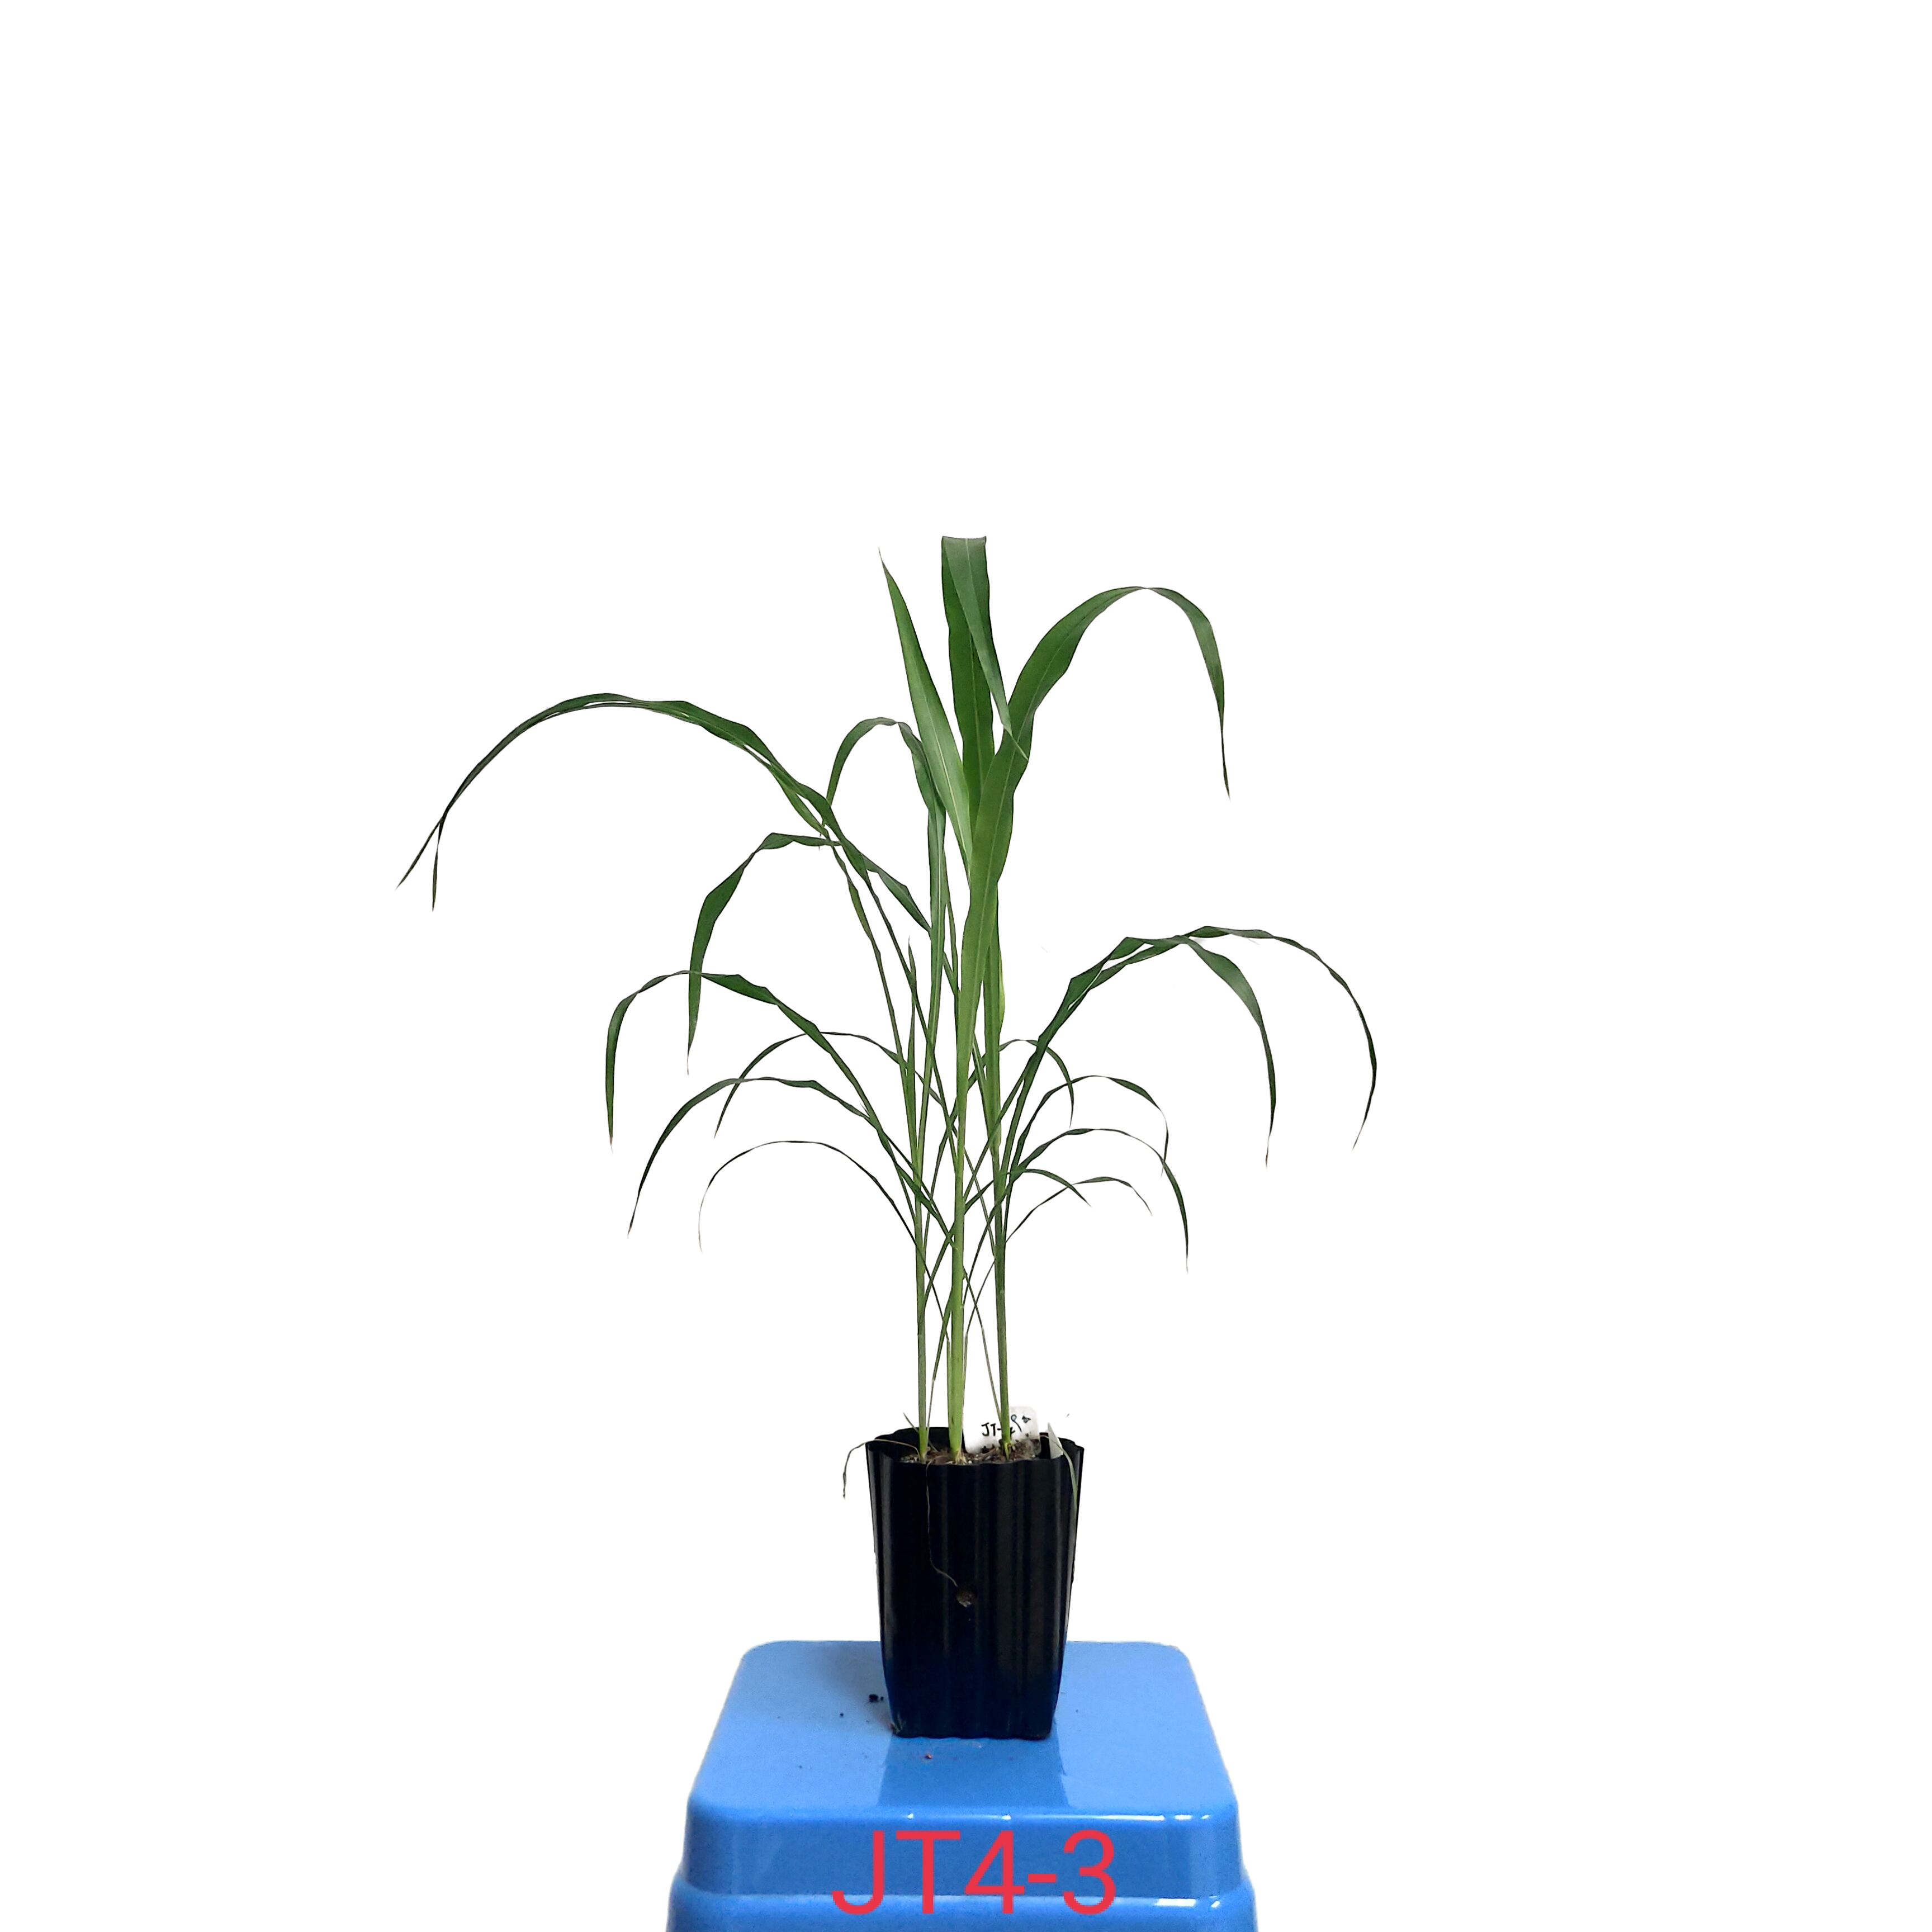


**FIGURE S1 | Growth performance of sweet sorghum KFJT-4 after cultivation of 40 days**

**TABLE S1 | Growth traits of sweet sorghum KFJT-4 after cultivation of 40 days. n is the number of plants.**

| **Parameters** | **Measured values (mean** ± ***SE*, *n* = 23)** |
| --- | --- |
| Natural plant height (cm) | 62.96 ± 2.54 |
| Banded plant height (cm) | 89.39 ± 3.32 |
| Stem diameter (cm) | 7.75 ± 0.38 |
| Number of leaves | 7.30 ± 0.23 |
| Leaf area (cm2) | 103.40 ± 8.53 |
| Leaf length (cm) | 52.71 ± 2.61 |
| Average width (cm) | 1.85 ± 0.09 |
| Maximum width (cm) | 2.64 ± 0.10 |

**TABLE S2 | Fitted (Ye model and NRH model) and measured values of maximum net photosynthetic rate(*A*nmax), saturation irradiance corresponding to *A*nmax (*I*sat), light-saturated stomatal conductance (*g*s-max), saturation irradiance corresponding to *g*s-max (*I*g-sat), light-saturatedtranspiration rate *(T*r-max), saturation irradiance corresponding to *T*r-max (*I*T-sat), maximum intrinsic water use efficiency (WUEi), saturation irradiancecorresponding to WUEi (*I*i-sat), maximum instantaneous water use efficiency (WUEinst-max), and saturation irradiance corresponding to WUEinst-max (*I*inst-sat) for sweet sorghum under different temperature conditions at atmospheric CO2 level.**

| **T**  **(℃)** | ***A*nmax (μmol m–2 s–1)** | | |  | ***I*sat (μmol m–2 s–1)** | | |
| --- | --- | --- | --- | --- | --- | --- | --- |
| **Ye model** | **NRH model** | **Measured value** |  | **Ye model** | **NRH model** | **Measured value** |
| 25 | 20.70 ± 0.73 b | 21.07 ± 1.02 a | 20.13 ± 0.68 a |  | 1434.9 ± 92.9 a | ― | 1400.0 ± 115.5 a |
| 30 | 30.54 ± 0.76 a | 32.25 ± 1.68 a | 29.96 ± 1.47 a |  | 1460.8 ± 169.7 a | ― | 1466.7 ± 66.7 a |
| 35 | 37.67 ± 0.96 b | 42.30 ± 1.21 a | 37.49 ± 0.90 a |  | 1710.8 ± 31.3 b | ― | 1866.7 ± 33.3 a |
|  | ***g*s-max (mol m–2 s–1)** | | |  | ***I*g-sat (μmol m–2 s–1)** | | |
|  | **Ye model** | **NRH model** | **Measured value** |  | **Ye model** | **NRH model** | **Measured value** |
| 25 | 0.138 ± 0.012 a | 0.123 ± 0.012 a | 0.137 ± 0.012 a |  | 1765.9 ± 158.0 a | ― | 1800.0 ± 115.5 a |
| 30 | 0.194 ± 0.010 a | 0.167 ± 0.011 a | 0.191 ± 0.010 a |  | 1654.9 ± 22.3 a | ― | 1600.0 ± 0.0 a |
| 35 | 0.252 ± 0.009 a | 0.259 ± 0.004 a | 0.257 ± 0.008 a |  | 1900.9 ± 74.5 a | ― | 2000.0 ± 0.0 a |
|  | ***T*r-max (mmol m–2 s–1)** | | |  | ***I*T-sat (μmol m–2 s–1)** | | |
|  | **Ye model** | **NRH model** | **Measured value** |  | **Ye model** | **NRH model** | **Measured value** |
| 25 | 1.68 ± 0.11 a | 1.54 ± 0.11 a | 1.72 ± 0.11 a |  | 2292.3 ± 392.2 a | ― | 2000 a |
| 30 | 3.56 ± 0.15 a | 4.01 ± 0.48 a | 3.58 ± 0.20 a |  | 2578.4 ± 319.2 | ― | >2000 |
| 35 | 5.83 ± 0.27 a | 6.52 ± 0.26 a | 5.76 ± 0.21 a |  | 2663.2 ± 310.5 | ― | >2000 |
|  | **WUEi-max (μmol mol–1)** | | |  | ***I*i-sat (μmol m–2 s–1)** | | |
|  | **Ye model** | **NRH model** | **Measured value** |  | **Ye model** | **NRH model** | **Measured value** |
| 25 | 174.2 ± 3.6 b | 200.2 ± 9.8 a | 174.3 ± 5.2 b |  | 615.4 ± 32.2 a | ― | 466.7 ± 176.4 a |
| 30 | 163.1 ± 2.1 b | 192.5 ± 8.9 a | 161.4 ± 2.4 b |  | 965.4 ± 76.8 a | ― | 733.3 ± 66.7 a |
| 35 | 151.4 ± 6.5 b | 225.7 ± 18.6 a | 167.4 ± 18.1 b |  | 859.9 ± 222.5 a | ― | 733.3 ± 33.3 a |
|  | **WUEinst-max (μmol mmol–1)** | | |  | ***I*inst-sat (μmol m–2 s–1)** | | |
|  | **Ye model** | **NRH model** | **Measured value** |  | **Ye model** | **NRH model** | **Measured value** |
| 25 | 14.12 ± 0.22 b | 16.03 ± 0.64 a | 13.81 ± 0.28 b |  | 602.7 ± 18.0 a | ― | 633.3 ± 120.2 a |
| 30 | 9.70 ± 0.20 b | 10.94 ± 0.58 a | 9.71 ± 0.18 b |  | 799.1 ± 63.6 a | ― | 666.7 ± 88.2 a |
| 35 | 7.21 ± 0.35 b | 10.45 ± 0.89 a | 8.07 ± 0.87 b |  | 728.2 ± 130.1 a | ― | 600.0 ± 115.5 a |

*At a given temperature, different letters denote statistically significant differences (p<0.05) among the measured value, the value fitted by the Ye model and the value fitted by the NRH model.*

**TABLE S3 | Fitted (Ye model and NRH model) and measured values of maximum net photosynthetic rate(*A*nmax), saturation irradiance corresponding to *A*nmax (*I*sat), light-saturated stomatal conductance (*g*s-max), saturation irradiance corresponding to *g*s-max (*I*g-sat), light-saturatedtranspiration rate *(T*r-max), saturation irradiance corresponding to *T*r-max (*I*T-sat), maximum intrinsic water use efficiency (WUEi), saturation irradiancecorresponding to WUEi (*I*i-sat), maximum instantaneous water use efficiency (WUEinst-max), and saturation irradiance corresponding to WUEinst-max (*I*inst-sat) for sweet sorghum under different CO2 concentrations at 30℃.**

| **CO2 level**  **(μmol mol–1)** | ***A*nmax (μmol m–2 s–1)** | | |  | ***I*sat (μmol m–2 s–1)** | | |
| --- | --- | --- | --- | --- | --- | --- | --- |
| **Ye model** | **NRH model** | **Measured value** |  | **Ye model** | **NRH model** | **Measured value** |
| 250 | 25.84 ± 0.65 b | 27.01 ± 0.71 b | 25.22 ± 0.617 b |  | 1393.8 ± 71.5 a | ― | 1466.7 ± 133.3 a |
| 410 | 30.54 ± 0.76 a | 32.25 ± 1.68 a | 29.96 ± 1.47 a |  | 1460.8 ± 169.7 a | ― | 1466.7 ± 66.7 a |
| 550 | 29.88 ± 1.07 b | 33.43 ± 1.10 a | 30.17 ± 0.88 b |  | 1782.4 ± 30.1 a | ― | 1866.7 ± 66.7 a |
|  | ***g*s-max (mol m–2 s–1)** | | |  | ***I*g-sat (μmol m–2 s–1)** | | |
|  | **Ye model** | **NRH model** | **Measured value** |  | **Ye model** | **NRH model** | **Measured value** |
| 250 | 0.293 ± 0.012 a | 0.237 ± 0.040 a | 0.291 ± 0.012 a |  | 1484.6 ± 184.4 a | ― | 1533.3 ± 66.7 a |
| 410 | 0.194 ± 0.010 a | 0.167 ± 0.011 a | 0.191 ± 0.010 a |  | 1654.9 ± 22.3 a | ― | 1600.0 ± 0.0 a |
| 550 | 0.156 ± 0.008 a | 0.161 ± 0.002 a | 0.156 ± 0.010 a |  | 2533.6 ± 328.5 | ― | >2000 |
|  | ***T*r-max (mmol m–2 s–1)** | | |  | ***I*T-sat (μmol m–2 s–1)** | | |
|  | **Ye model** | **NRH model** | **Measured value** |  | **Ye model** | **NRH model** | **Measured value** |
| 250 | 5.48 ± 0.36 a | 5.13 ± 0.76 a | 5.59 ± 0.53 b |  | 2378.8 ± 142.1 | ― | >2000 |
| 410 | 3.56 ± 0.15 a | 4.01 ± 0.48 a | 3.58 ± 0.20 a |  | 2578.4 ± 319.2 | ― | >2000 |
| 550 | 2.62 ± 0.13 a | 2.74 ± 0.04 a | 2.58 ± 0.19 a |  | 2837.3 ± 396.3 | ― | >2000 |
|  | **WUEi-max (μmol mol–1)** | | |  | ***I*i-sat (μmol m–2 s–1)** | | |
|  | **Ye model** | **NRH model** | **Measured value** |  | **Ye model** | **NRH model** | **Measured value** |
| 250 | 88.6 ± 2.7 b | 120.8 ± 13.7 a | 88.70 ± 1.70 b |  | 1227.7 ± 62.6 a | ― | 1133.3 ± 133.3 a |
| 410 | 163.1 ± 2.1 b | 192.5 ± 8.9 a | 161.4 ± 2.4 b |  | 965.4 ± 76.8 a | ― | 733.3 ± 66.7 a |
| 550 | 232.4 ± 6.6 b | 281.7 ± 12.9 a | 237.2 ± 8.9 b |  | 806.8 ± 54.0 a | ― | 733.3 ± 66.7 a |
|  | **WUEinst-max (μmol mmol–1)** | | |  | ***I*inst-sat (μmol m–2 s–1)** | | |
|  | **Ye model** | **NRH model** | **Measured value** |  | **Ye model** | **NRH model** | **Measured value** |
| 250 | 5.26 ± 0.19 b | 7.65 ± 0.94 a | 5.27 ± 0.15 b |  | 985.7 ± 14.9 a | ― | 933.3 ± 66.7 a |
| 410 | 9.70 ± 0.20 b | 10.94 ± 0.58 a | 9.71 ± 0.18 b |  | 799.1 ± 63.6 a | ― | 666.7 ± 88.2 a |
| 550 | 14.05 ± 0.47 b | 16.95 ± 0.91 a | 14.30 ± 0.54 b |  | 815.7 ± 49.9 a | ― | 733.3 ± 66.7 a |

*At a given CO2 concentrations, different letters denote statistically significant differences (p<0.05) among the measured value, the value fitted by the Ye model and the value fitted by the NRH model.*

**TABLE S4 | Interactive effects of elevating CO2 and warming on photosynthesis of sweet sorghum.**

| **Photosynthetic parameters** | **35 ℃** | **30 ℃** | **35 ℃** |
| --- | --- | --- | --- |
| **410 μmol mol–1** | **550 μmol mol–1** | **550 μmol mol–1** |
| *α* | 0.0732 ± 0.0026 a | 0.0610 ± 0.0068 b | 0.0649 ± 0.0033 ab |
| *A*nmax (μmol m–2 s–1) | 37.67 ± 0.96 a | 29.88 ± 1.07 b | 39.87 ± 1.92 a |
| *I*sat (μmol m–2 s–1) | 1710.8 ± 31.3 b | 1782.36 ± 30.13 b | 2064.90 ± 45.82 a |
| *I*c (μmol m–2 s–1) | 39.27 ± 5.19 a | 28.87 ± 1.90 b | 38.64 ± 2.9 a |
| *R*d (μmol m–2 s–1) | 2.80 ± 0.44 a | 1.70 ± 0.13 b | 2.43 ± 0.18 a |
| *α*s | 0.0004 ± 0.0000 a | 0.0002 ± 0.0000 b | 0.0002 ± 0.0000 b |
| *g*s-max (mol m–2 s–1) | 0.252 ± 0.008 a | 0.156 ± 0.008 c | 0.215 ± 0.01 b |
| *I*g-sat (μmol m–2 s–1) | 1900.89 ± 74.45 b | 2533.57 ± 328.53 b | 3484.01 ± 395.74 a |
| *g*s0 (mol m–2 s–1) | 0.011 ± 0.008 a | 0.016 ± 0.001 a | 0.006 ± 0.003 a |
| *α*r | 0.0072 ± 0.0006 a | 0.0028 ± 0.0003 c | 0.0053 ± 0.0007 b |
| *T*r-max (mmol m–2 s–1) | 5.83 ± 0.27 a | 2.62 ± 0.13 b | 4.94 ± 0.45 a |
| *I*T-sat (μmol m–2 s–1) | 2663.16 ± 310.52 a | 2837.28 ± 396.25 a | 2561.44 ± 123.51 a |
| *T*r0 (mmol m–2 s–1) | 0.25 ± 0.16 a | 0.27 ± 0.02 a | 0.21 ± 0.06 a |
| *α*i | 3.9871 ± 1.412 b | 3.1903 ± 0.5037 b | 9.1759 ± 1.8803 a |
| WUEi-max (μmol mol–1) | 151.34 ± 6.46 c | 232.37 ± 6.57 b | 255.46 ± 5.26 a |
| *I*i-sat (μmol m–2 s–1) | 859.94 ± 222.47 a | 806.83 ± 54.02 ab | 644.44 ± 49.65 b |
| *K*i (μmol mol–1) | 75.18 ± 19.12 b | 66.68 ± 7.90 b | 181.31 ± 25.48 a |
| *α*inst | 0.1706 ± 0.0618 a | 0.1849 ± 0.0293 a | 0.2941 ± 0.0656 a |
| WUEinst-max (μmol mol–1) | 7.21 ± 0.35 c | 14.05 ± 0.47 a | 9.91 ± 0.64 b |
| *I*inst-sat (μmol m–2 s–1) | 728.23 ± 30.09 a | 815.71 ± 49.94 a | 816.50 ± 54.83 a |
| *K*inst (μmol mol–1) | 3.43 ± 0.88 b | 3.91 ± 0.47 b | 6.19 ± 0.99 a |

*Different letters denote statistically significant differences (p<0.05) among the values fitted by the Ye model, the values fitted by the NRH model, and the measured values*.


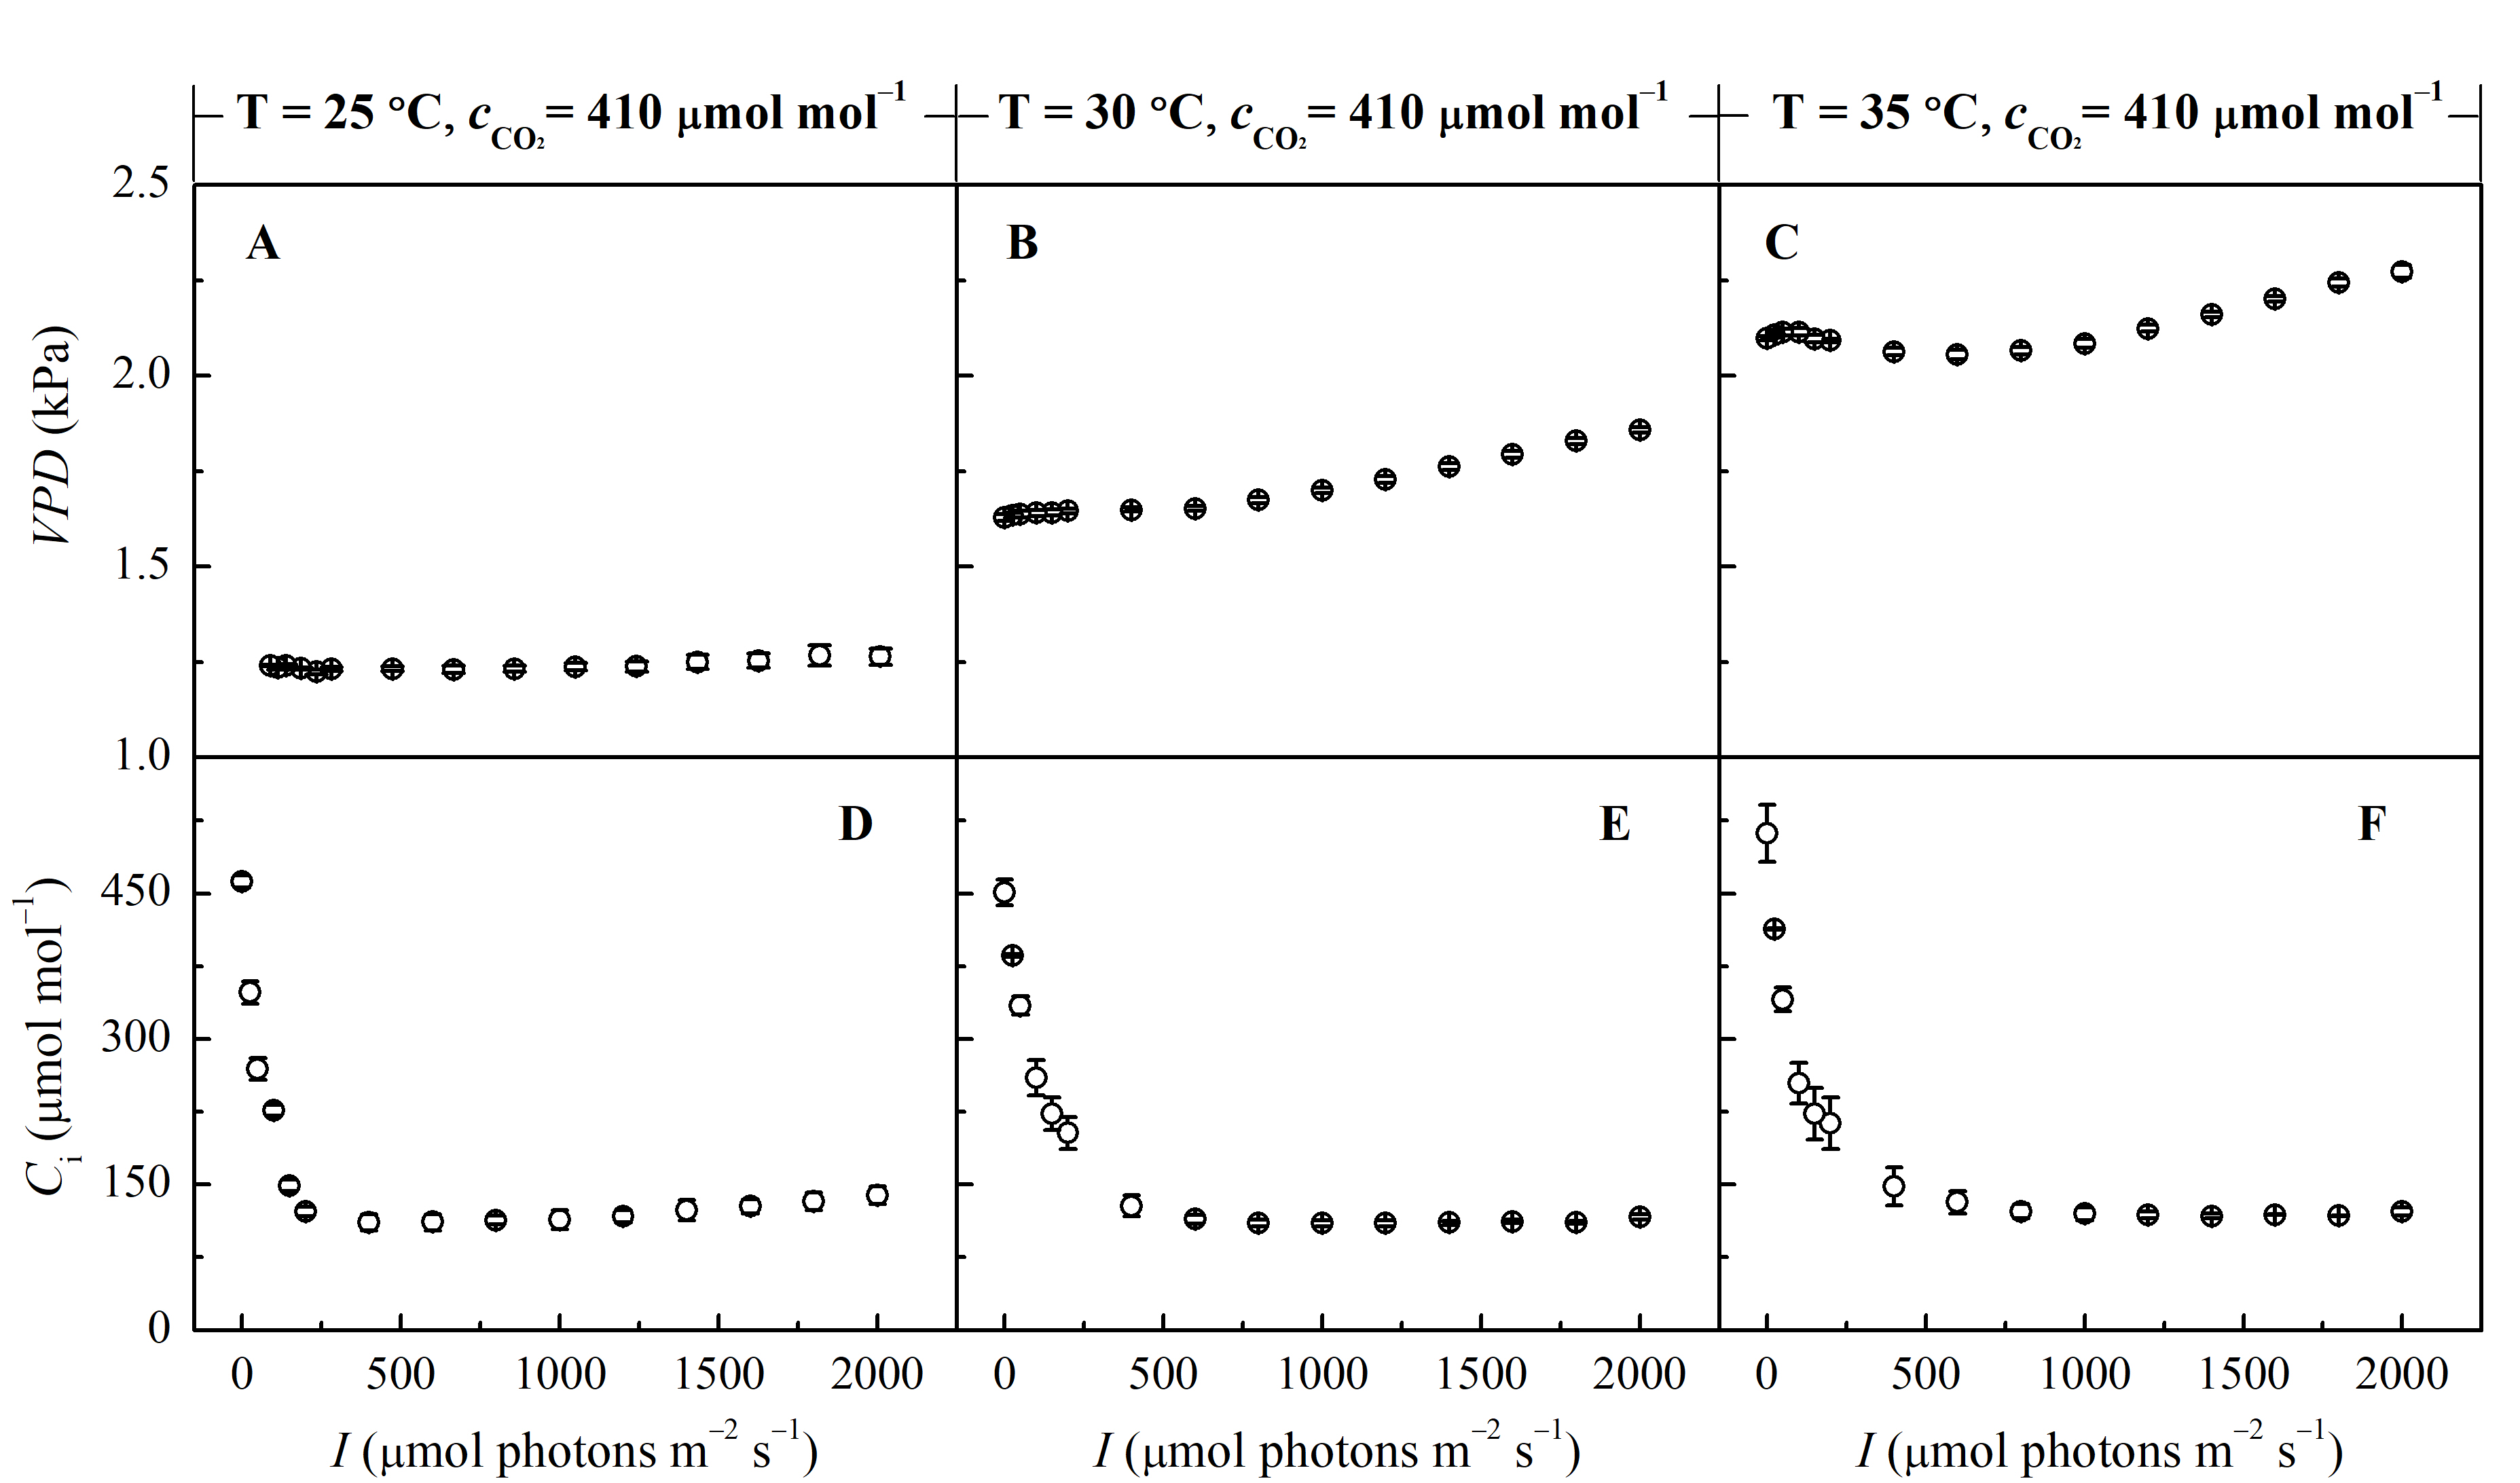


**FIGURE S2 | Vapor pressure deficit (VPD) (A, B, C) and intercellular CO2 concentration (*C*i) (D, E, F) over irradiance (*I*) levels for sweet sorghum under different temperature conditions at atmospheric CO2 level.**


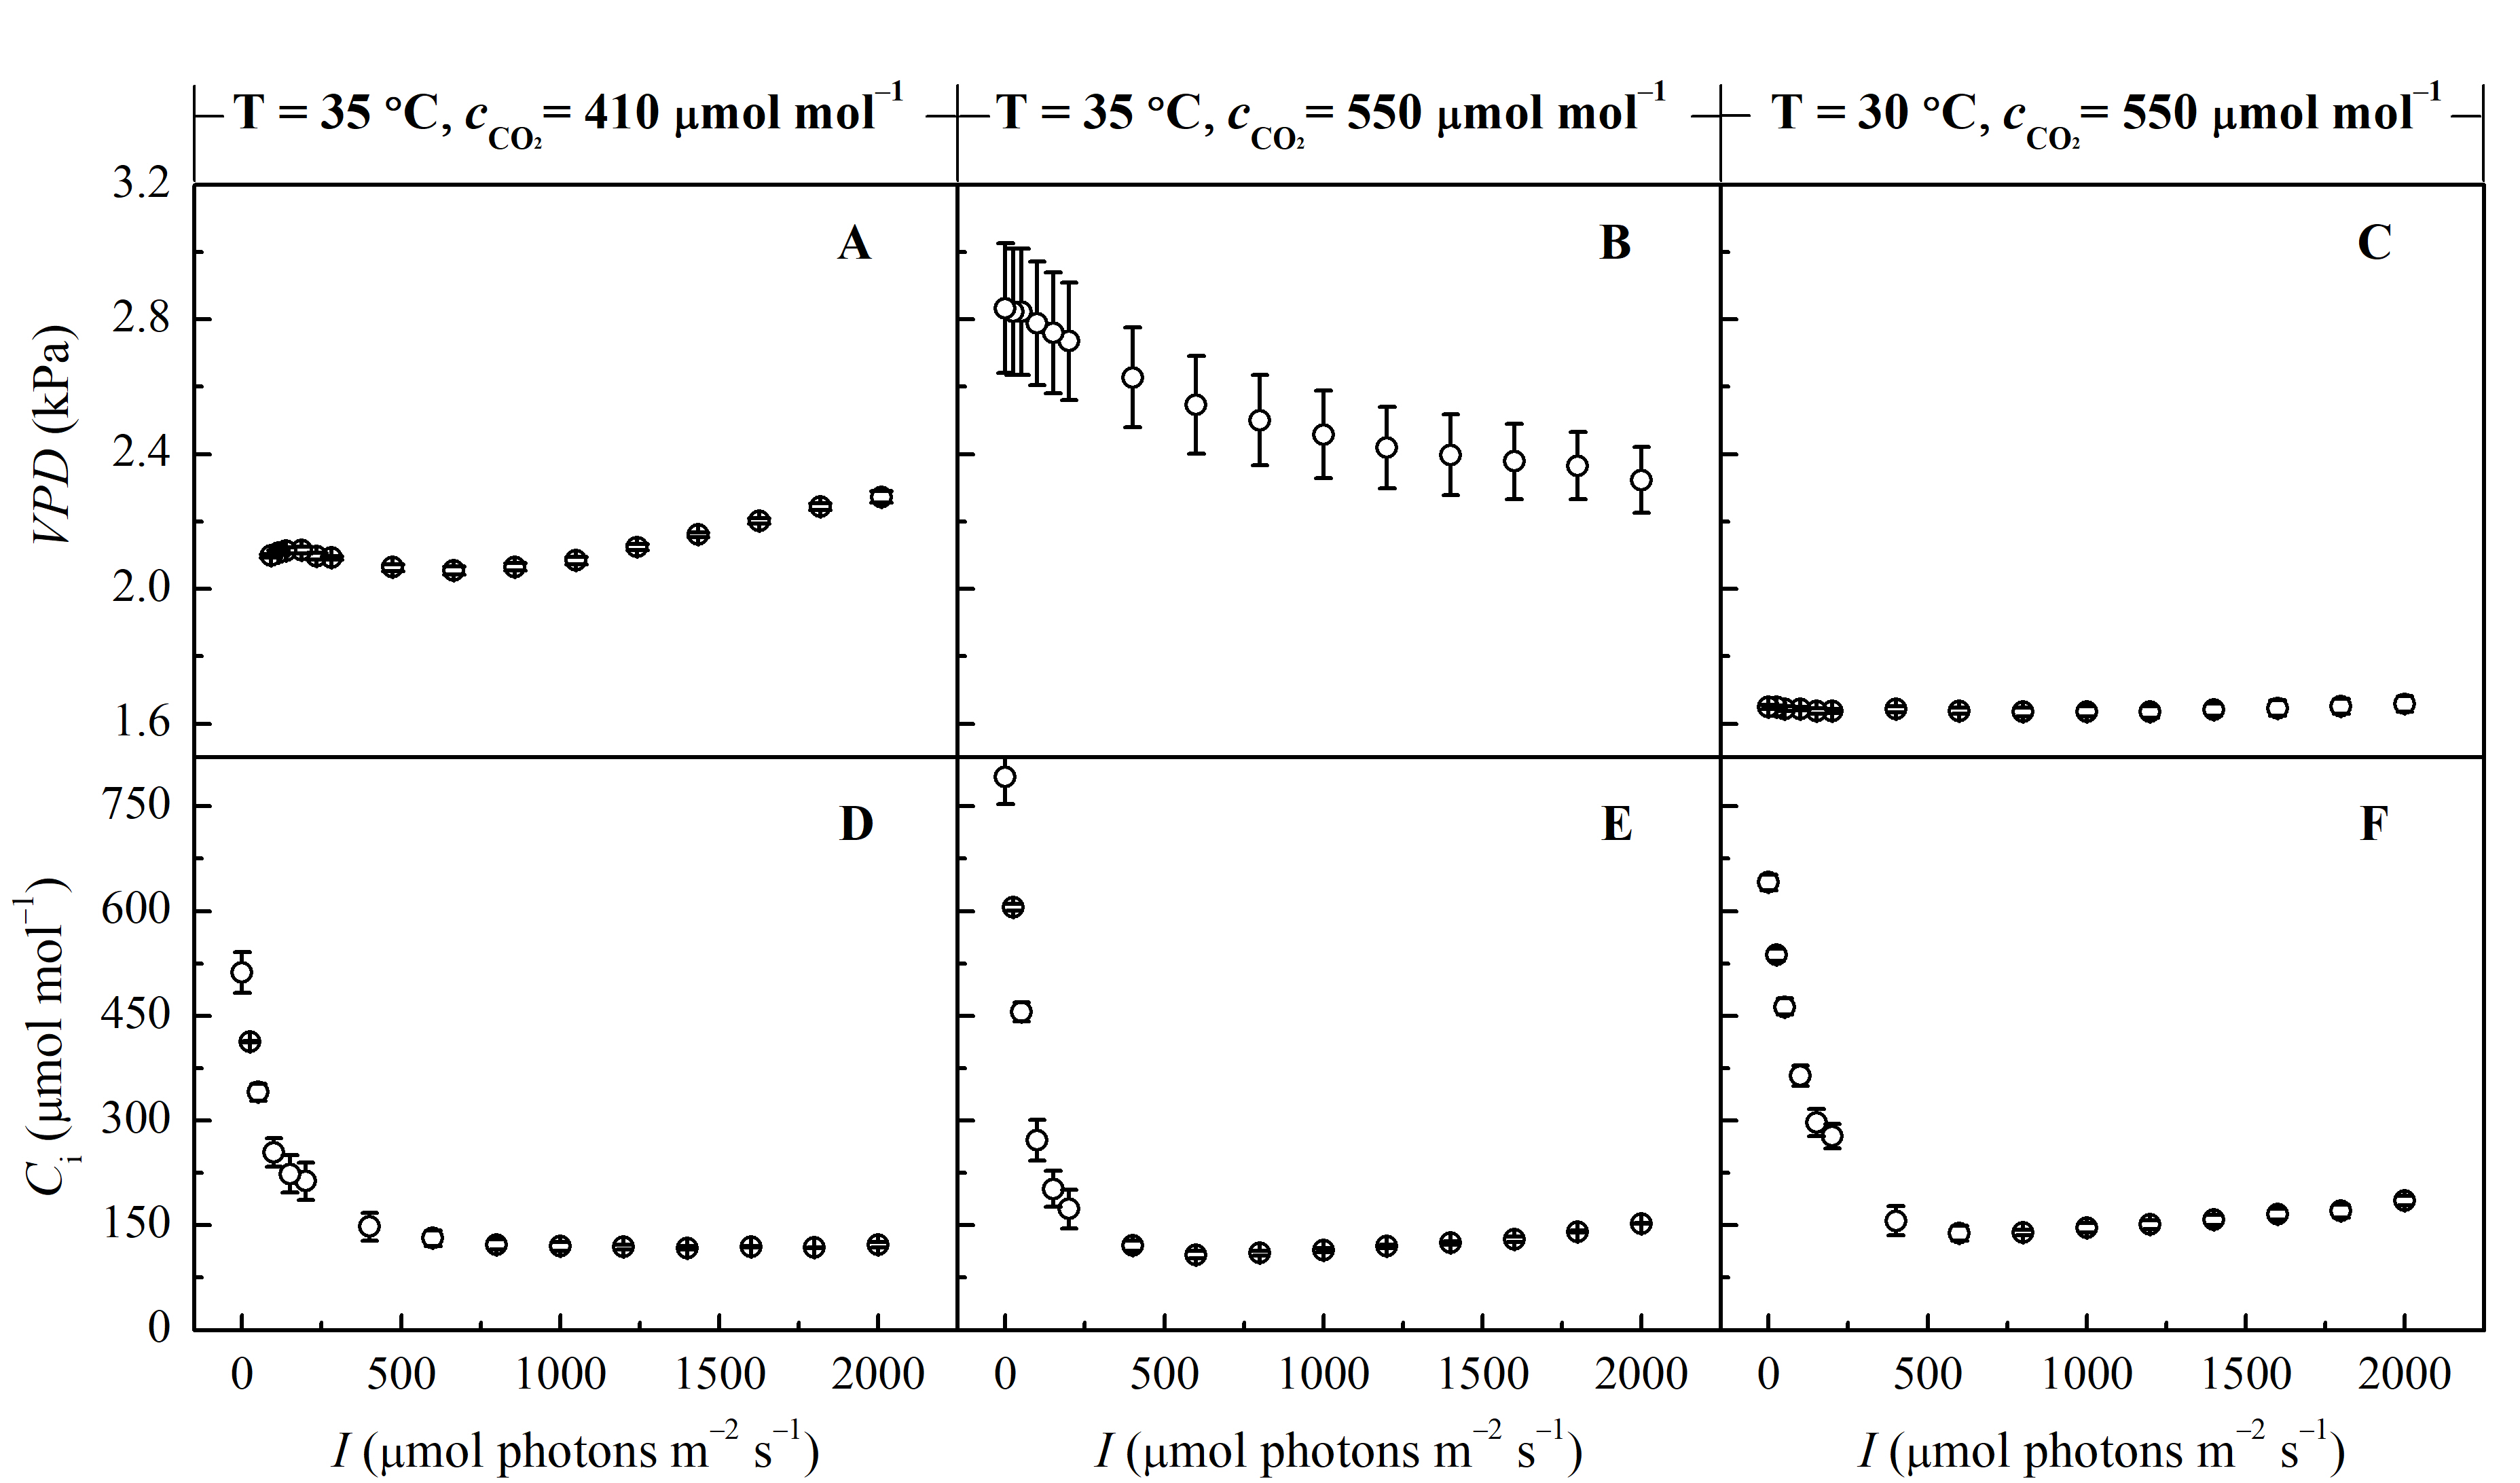


**FIGURE S3 | Vapor pressure deficit (VPD) (A, B, C) and intercellular CO2 concentration (*C*i) (D, E, F) over irradiance (*I*) levels for sweet sorghum under different temperature and CO2 concentration conditions.**
